# Supplementary material for: Feasibility and Applicability of Wireless Handheld Ultrasound Measurement of Carotid Intima-Media Thickness in Patients with Cardiac Symptoms
Source: PubMed Central journal article supplement — Yonsei Med J. 2020 Jan 22;61(2):129–36. doi: 10.3349/ymj.2020.61.2.129 (PMC6992452; doi:10.3349/ymj.2020.61.2.129), 2020-01-22
Supplement: ymj-61-129-s001.pdf [file ymj-61-129-s001.pdf]

**Supplementary Table 1.** The Relationship between the max-CIMT and Number of Diseased Coronary Arteries

| <b>Number of coronary arteries</b> | <b>Sample size (n)</b> | <b>max-CIMT (mm)</b> | <b><i>p</i></b> |
|------------------------------------|------------------------|----------------------|-----------------|
| Minimal                            | 34                     | 1.13±0.27            |                 |
| 1VD                                | 12                     | 1.46±0.51            | 0.004           |
| 2VD                                | 13                     | 1.33±0.28            |                 |
| 3VD                                | 16                     | 1.49±0.44            |                 |

max-CIMT, mean of maximal value of carotid intima-medial thickness of a patient; VD, vessel disease.
